# Supplementary material for: PPAR-pan activation induces hepatic oxidative stress and lipidomic remodelling
Source: PubMed Central journal article supplement (PMC4891066; doi:10.1016/j.freeradbiomed.2015.11.033), 2016-06
Supplement: mmc1.pdf [file mmc1.pdf]

**Supplementary table 1:** Summary of microscopy findings according to treatment groups.

Abbreviations: TK, terminal kill; R, recovery.

|                         |                               |    | Control | Low dose | Inter-mediate 1 | Inter-mediate 2 | High |
|-------------------------|-------------------------------|----|---------|----------|-----------------|-----------------|------|
| Muscle                  | myopathy/<br>inflammation     | TK | 7/12    | 5/12     | 7/12            | 9/12            | 6/9  |
|                         |                               | R  | 6/6     |          |                 | 6/6             | 3/6  |
| Liver                   | hepatocyte<br>vacuolation     | TK |         |          | 1/12            |                 |      |
|                         |                               | R  |         |          |                 |                 |      |
|                         | Hypertrophy                   | TK | 0/12    | 5/12     | 12/12           | 12/12           | 9/9  |
|                         |                               | R  |         |          |                 | 2/6             | 2/6  |
| Heart                   | myopathy/<br>inflammation     | TK | 4/12    | 4/12     | 5/12            | 8/12            | 9/9  |
|                         |                               | R  | 5/6     |          |                 | 2/6             | 4/6  |
| Mesenteric fat          | reduced<br>limphocyte size    | TK |         |          |                 |                 | 3/9  |
|                         |                               | R  |         |          |                 |                 |      |
| Adrenal gland           | increased<br>microvacuolation | TK |         |          |                 |                 | 5/9  |
|                         |                               | R  |         |          |                 |                 | 2/6  |
| Thyroid gland           | Hypertrophy                   | TK | 1/12    | 2/12     | 1/12            | 1/12            | 2/9  |
|                         |                               | R  |         |          |                 |                 |      |
| Diaphragm               | Myopathy                      | TK |         |          |                 | 2/12            | 8/9  |
|                         |                               | R  |         |          |                 |                 | 2/6  |
| Gastrocnemius<br>muscle | Myopathy                      | TK | 1/12    | 2/12     | 1/12            | 3/12            | 8/9  |
|                         |                               | R  |         |          |                 |                 |      |
| Soleus muscle           | Myopathy                      | TK | 4/12    | 7/12     | 11/12           | 10/12           | 8/9  |
|                         |                               | R  | 1/6     |          |                 |                 |      |
| Intercostal<br>muscle   | Myopathy                      | TK | 0/12    | 1/12     | 0/12            | 5/12            | 9/9  |
|                         |                               | R  |         |          |                 |                 |      |
| Brown subcut fat        | macrovacuolation              | TK | 2/12    | 1/12     | 2/12            | 4/12            | 5/9  |
|                         |                               | R  |         |          |                 | 1/6             | 1/6  |
| Aortic brown fat        | macrovacuolation              | TK | 0/12    | 3/12     | 6/12            | 4/12            | 4/9  |
|                         |                               | R  | 1/6     |          |                 |                 | 1/6  |
| Epididymal fat          | Steatitis                     | TK |         |          | 1/12            |                 |      |
|                         |                               | R  |         |          |                 |                 |      |

**Supplementary table 2:** A list of mass to charge ( $m/z$ ) ratios showing  $[M-H]^-$  values for each measured aqueous metabolite and the corresponding fragment ion after collision-induced dissociation (CID). Q1 denotes the parent ions, whereas Q3 denotes the fragment ions. **Abbreviations:** 3PG, 3-phosphoglycerate; ADP, adenosine diphosphate; AMP, adenosine monophosphate; ATP, adenosine triphosphate; cAMP, cyclic adenosine monophosphate; cGMP, cyclic guanosine monophosphate; CMP, cytidine monophosphate; FAD, flavin adenine dinucleotide; GDP, guanosine diphosphate; GMP, guanosine monophosphate; GSH, glutathione; GSSG, oxidised glutathione; GTP, guanosine triphosphate; NAD, nicotinamide adenine dinucleotide; PCr, phosphocreatine; PEP, phosphoenolpyruvate; SAH, S-adenosyl-homocysteine; SAM, S-adenosyl-methionine; UMP, uridine monophosphate.

| Analyte     | Q1    | Q3    | Analyte         | Q1    | Q3    |
|-------------|-------|-------|-----------------|-------|-------|
| 3-PG        | 187.0 | 105.0 | GSH             | 308.1 | 179.0 |
| Acetyl-CoA  | 810.0 | 303.2 | GSSG            | 613.1 | 355.0 |
| Adenine     | 136.0 | 119.0 | GTP             | 523.9 | 152.0 |
| Adenosine   | 268.1 | 136.1 | Guanine         | 152.0 | 134.9 |
| ADP         | 428.0 | 136.0 | Guanosine       | 284.1 | 152.1 |
| AMP         | 348.0 | 136.0 | Malonyl-CoA     | 854.0 | 347.1 |
| ATP         | 508.0 | 136.0 | Methyl-cytosine | 126.0 | 109.1 |
| cAMP        | 330.1 | 136.1 | NAD             | 664.0 | 427.9 |
| CDP-choline | 489.1 | 184.1 | Oxo-methionine  | 165.0 | 105.0 |
| cGMP        | 346.1 | 152.1 | PCr             | 212.1 | 177.1 |
| CMP         | 324.1 | 112.0 | PEP             | 169.1 | 150.9 |
| Cytidine    | 244.1 | 112.0 | SAH             | 385.1 | 136.1 |
| Cytosine    | 112.0 | 95.0  | SAM             | 399.0 | 250.1 |
| FAD         | 786.1 | 348.0 | UMP             | 325.1 | 96.9  |
| GDP         | 444.0 | 152.0 | Uracil          | 112.9 | 70.1  |
| GMP         | 364.2 | 152.1 | Uridine         | 245.1 | 112.9 |

**Supplementary table 3:** Eicosanoid method gradient

| Analysis             |                                                                                                                   |
|----------------------|-------------------------------------------------------------------------------------------------------------------|
| column               | C <sub>18</sub> Luna column (Phenomenex)                                                                          |
| column dimensions    | 150 mm x 2 mm, 3 $\mu$ m                                                                                          |
| Liquid chromatograph | Waters Acquity                                                                                                    |
| flow rate            | 0.4 mL/min                                                                                                        |
| mobile phase A       | 0.1 % acetic acid                                                                                                 |
| mobile phase B       | 0.1 % acetic acid<br>in acetonitrile: methanol (80 :20)                                                           |
| gradient             | 0 min 15% B<br>1.5 min 30% B<br>10.5 min 60% B<br>16 min 80% B<br>19 min 100% B<br>19.1 min 15% B<br>21 min 15% B |

**Supplementary table 4:** A list of mass to charge ( $m/z$ ) ratios showing  $[M-H]^-$  values for each measured eicosanoid and the corresponding fragment ion after collision-induced dissociation (CID). Q1 denotes the parent ions, whereas Q3 denotes the fragment ions **Abbreviations:** AA, arachidonic acid; DGLA, dihomo- $\gamma$ -linolenic acid; DHEA, docosahexaenoic acid; DHET, dihydroxyeicosatrienoic acid; DHOME, dihydroxyoctadecenoic acid; EET, epoxyeicosatrienoic acid; HDoHE, hydroxydocosahexaenoic acid; HEPE, hydroxyeicosapentaenoic acid; HETE, hydroxyeicosatetraenoic acid; HODE, hydroxyoctadienoic acid; LT, leukotriene; ODE, octadienoic acid, PG, prostaglandin; THET, trihydroxyeicosatetraenoic acid; THF, tetrahydrofuran; TX, thromboxane.

| Analyte       | Q1     | Q3    | Analyte                          | Q1      | Q3    |
|---------------|--------|-------|----------------------------------|---------|-------|
| 11(12)-EET    | 319.2  | 167   | 8,9-DHET                         | 337.2   | 127.1 |
| 11,12,15-THET | 353.2  | 167.1 | 8-HETE                           | 319.2   | 301.2 |
| 11,12-DHET    | 337.2  | 167.1 | 8-iso-PGE <sub>2</sub>           | 351     | 271   |
| 11-HEPE       | 317    | 169   | 8-isoPGF <sub>2</sub> $\alpha$   | 353.1   | 193.2 |
| 11-HETE       | 319.18 | 166.9 | 9(10)-EpOME                      | 295.2   | 171.1 |
| 12(13)-EpOME  | 295.2  | 195.2 | 9,10,13-TriHOME                  | 329.2   | 171.1 |
| 12,13-DHOME   | 313.2  | 183.2 | 9,10-DHOME                       | 313.2   | 201.2 |
| 12-HEPE       | 317.17 | 179   | 9,12,13-TriHOME                  | 329.2   | 211.1 |
| 12-HETE       | 319.2  | 179.2 | 9-HODE                           | 295.2   | 171   |
| 13-HDoHE      | 343.13 | 193   | 9-oxo-ODE                        | 292.2   | 185.1 |
| 13-HODE       | 295.2  | 195   | AA                               | 303.3   | 259.1 |
| 13-oxo-ODE    | 239.2  | 113   | DHEA                             | 327.2   | 283.1 |
| 14(15)-EET    | 319.2  | 219.3 | DGLA                             | 305.19  | 58.8  |
| 14,15-DHET    | 337.19 | 206.9 | Lipoxin A4                       | 351.2   | 115.2 |
| 15-deoxyPGJ2  | 315.2  | 271.3 | LTB <sub>4</sub>                 | 335.2   | 195.1 |
| 15-HETE       | 319.2  | 301.4 | PGB <sub>2</sub>                 | 333.069 | 59    |
| 15-oxo-EET    | 317.2  | 113.1 | PGD <sub>2</sub>                 | 351.2   | 271.3 |
| 19-HETE       | 319.2  | 275.1 | PGE <sub>2</sub>                 | 351.2   | 271.3 |
| 20-HETE       | 319.2  | 275.2 | PGE <sub>2</sub> -d <sub>4</sub> | 355.3   | 275.3 |
| 5(6)-EET      | 319.2  | 191   | PGF <sub>2</sub> $\alpha$        | 353.2   | 309.3 |
| 5,6-DHET      | 337.2  | 145.1 | THF diols                        | 353.2   | 167.1 |
| 5-oxo-EET     | 317.2  | 273.2 | TXB <sub>2</sub>                 | 369.2   | 169.1 |
